# Supplementary material for: Sol–gel synthesis and room-temperature properties of α-LiZr2(PO4)3
Source: Royal Society of Chemistry journal article supplement (doi:10.1039/c4ra16804f), 2015-01-01
Supplement: c4ra16804f1.pdf [file c4ra16804f1.pdf]

## Sol-gel synthesis and room-temperature properties of $\alpha$ -LiZr<sub>2</sub>(PO<sub>4</sub>)<sub>3</sub>

*Hany El-Shinawi, Colin Greaves, Jürgen Janek*

### Supporting Information

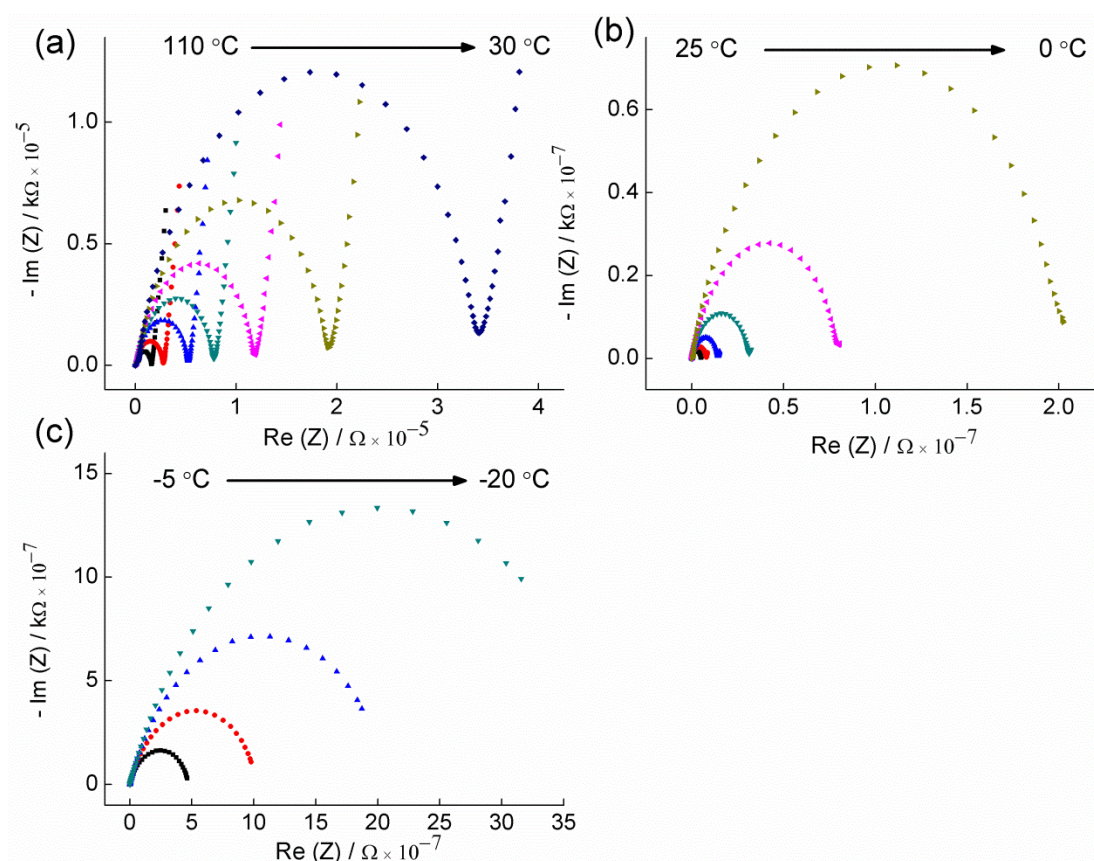

**Figure S1.** Impedance spectra for  $\alpha$ -LiZr<sub>2</sub>(PO<sub>4</sub>)<sub>3</sub> measured using Au electrodes (frequency range from 10 MHz to 1 Hz; 20 mV amplitude) in the temperature range 20–110 °C.
